# Supplementary material for: Assessing health systems in Guinea for prevention and control of priority zoonotic diseases: A One Health approach
Source: PubMed Central journal article supplement — One Health. 2019 Apr 16;7:100093. doi: 10.1016/j.onehlt.2019.100093 (PMC6479159; doi:10.1016/j.onehlt.2019.100093), 2019-04-16

**Figure S2:** Systems map for trypanosomiasis case identification, diagnosis, and reporting in Guinea, from the community level (top) to the international level (bottom). MOH = Ministry of Health; MOL = Ministry of Livestock; MOE = Ministry of Environment; IDSR=Integrated Disease Surveillance and Response; DPS = Prefectural Health Directorate; HAT = Human African trypanosomiasis; INSP = National Institute of Public Health (National Reference Laboratory); LCVD = Central Veterinary Diagnostic Laboratory; OGUIPAR = Guinean Office for Parks and Reserves; DNEF = National Directorate for Waters and Forests; WHO = World Health Organization; OIE = World Organisation for Animal Health.

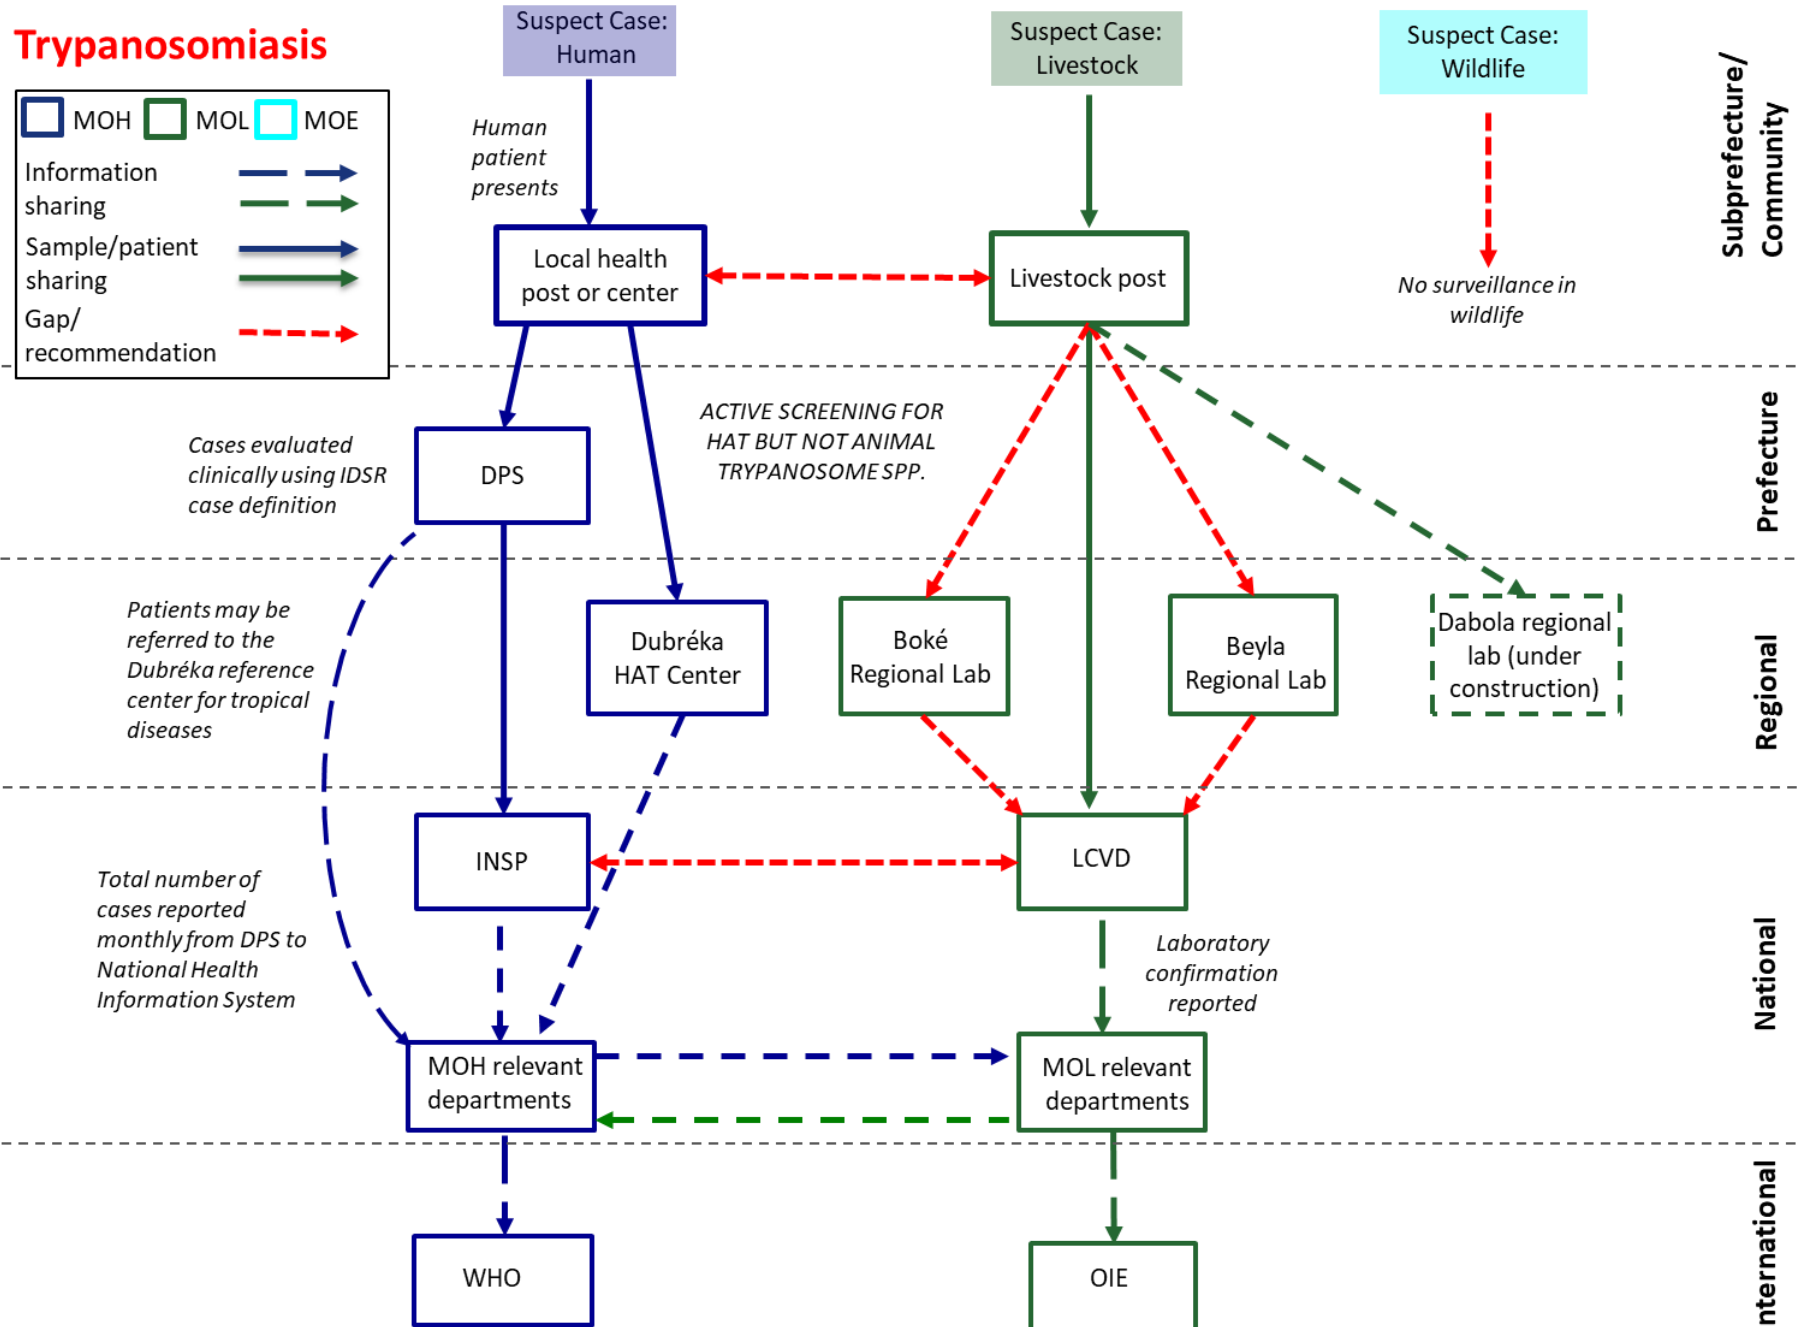

Supplement: mmc2.pdf [file mmc2.pdf]
