# Supplementary material for: Assessing health systems in Guinea for prevention and control of priority zoonotic diseases: A One Health approach
Source: PubMed Central journal article supplement — One Health. 2019 Apr 16;7:100093. doi: 10.1016/j.onehlt.2019.100093 (PMC6479159; doi:10.1016/j.onehlt.2019.100093), 2019-04-16
Supplement: mmc3.pdf [file mmc3.pdf]

## **Visites de laboratoire - « Une Seule Santé »**

### **Recrutement**

- 1) Combien de personnel avez-vous? À temps plein ou à temps partiel?

### **SOP**

- 1) Y a-t-il SOP (PON) sur place pour:
  - a. La collecte et le transport d'échantillon (ce que pour recueillir, la façon de recueillir et où l'envoyer à)?
  - b. Les tests diagnostics de laboratoire (tous les tests effectués)?
  - c. Rapports de laboratoire?
- 2) Y a-t-il une formation régulière pour tout le personnel? La formation est facilement accessible à tout le personnel? À quelle fréquence?

### **Le traitement des échantillons**

- 1) Comment sont les échantillons reçus?
  - a. Avez-vous reçu généralement échantillons visés à partir des laboratoires de la préfecture? Recevez-vous des spécimens ou des échantillons provenant d'autres sources?
  - b. Vous recevez uniquement des échantillons cliniques / patient pour les tests de diagnostic initiales, ou vous recevez également prélèvement / échantillons visés pour des tests de confirmation?
  - c. Est-ce que le laboratoire a établi les exigences d'emballage prélèvement pour recevoir des échantillons? Si non, comment les échantillons sont reçus, généralement?
  - d. Y a-t-il lieu central où les échantillons sont reçus et répertoriés avant de tester?
  - e. Quelle est la prochaine étape après réception?

- f. Comment sont inventoriés échantillons? Y a t-il une personne en particulier (s) responsable de l'inventaire de l'échantillon?
- 2) Quels sont les tests de diagnostic que vous exécutez dans le laboratoire?
- a. Quels sont les tests les plus communs?
- b. Avez-vous des réactifs et du matériel suffisant pour exécuter les tests nécessaires, ou d'un financement pour maintenir les fournitures nécessaires à des niveaux un problème?
- 3) Quels sont les pathogènes les plus communs détectés?
- 4) Y a t-il les modes opératoires normalisés [SOP] pour les tests de diagnostic disponibles et à jour pour chaque niveau de laboratoire?
- 5) Y a t-il des tests de diagnostic standard d'or définis pour chaque maladie prioritaire dans le laboratoire?
- 6) Pouvez-vous tester pour:
- ☐ Rage
  - ☐ Charbon bactériale
  - ☐ Brucellose bovine
  - ☐ Fièvres hémorragiques Virales (FVR, Ebola, Marburg, Lassa, etc)
  - ☐ Trypanosomiase
- 7) Si vous ne possédez pas le diagnostic que vous pensez que vous en avez besoin, ou vous avez besoin d'une confirmation supplémentaire, où envoyez-vous l'échantillon suivant?
- 8) Y a t-il une chaîne de traçabilité pour les échantillons comme ils vont de la préfecture aux laboratoires nationaux? Et pour les laboratoires de référence internationaux?
- a. Où sont les échantillons envoyés?

- b. Est-ce que une liste de laboratoires de référence (interne / international) a été publiée et diffusée à tous les laboratoires?
- c. Est-ce que chaque laboratoire possède une copie ou une carte de laboratoires de référence avec des informations de contact et les adresses?
- d. Comment sont envoyés les échantillons?
- e. Est-ce que quelqu'un suit si les spécimens sont reçus et traités au laboratoire de référence?
- f. Comment sont les résultats de tests de diagnostic communiqués au retour au ministère / officielle qui les a soumis? Et dans quel délai généralement?

9) Quel équipement est disponible pour une utilisation?

- |                                                       |       |
|-------------------------------------------------------|-------|
| <input type="checkbox"/> Machine PCR                  | Nº. : |
| <input type="checkbox"/> Incubateur (CO2)             | Nº. : |
| <input type="checkbox"/> Incubateur (non-CO2)         | Nº. : |
| <input type="checkbox"/> Autoclave                    | Nº. : |
| <input type="checkbox"/> Centrifugeuse                | Nº. : |
| <input type="checkbox"/> Frigo (4C)                   | Nº. : |
| <input type="checkbox"/> congélateur (-20 ° C)        | Nº. : |
| <input type="checkbox"/> congélateur (-80 ° C)        | Nº. : |
| <input type="checkbox"/> lecteur ELISA et la rondelle | Nº. : |
| <input type="checkbox"/> microscope optique de base   | Nº. : |
| <input type="checkbox"/> biosécurité Cabinet          | Nº. : |
| <input type="checkbox"/> micropipets calibrés         | Nº. : |

10) Est-ce que le système de laboratoire ont une LQMS ou AQ / QC normes similaires de l'ensemble du système?

**Communication**

- 1) Quel est le temps de demi-tour prévu pour l'achèvement et la communication des résultats de diagnostic?

- 2) Avez-vous / comment communiquez-vous les résultats des tests de diagnostic pour la soumission / demande individuelle / unité? (fax, sms, papier, téléphone)
- 3) Est-ce vous communiquez les résultats des tests (positifs ou négatifs) au niveau national?
  - a. Si oui, quand et comment?
- 4) Y a t-il une politique (formel ou informel) pour la communication à d'autres laboratoires du secteur? E.g., si la maladie que vous identifiez est zoonotique, est-il un processus pour assurer que MoH, MoEl, et MoEn ou leurs filiales sont chacune en contact?

### **Le traitement des déchets**

- 1) Comment les déchets de laboratoire traitée?
  - a. Y a t-il un autoclave de fonctionnement disponibles sur le site? (Si oui, est-il régulièrement utilisé avec des indicateurs de performance, tels que les bandes autoclaves?)
  - b. Y a t-il un incinérateur de fonctionnement sur le site?
- 2) Sont des échantillons traités et éliminés après le test?
  - a. Si oui, comment?
  - b. Si non, ce qui arrive à des échantillons?
