# Supplementary material for: Assessing health systems in Guinea for prevention and control of priority zoonotic diseases: A One Health approach
Source: PubMed Central journal article supplement — One Health. 2019 Apr 16;7:100093. doi: 10.1016/j.onehlt.2019.100093 (PMC6479159; doi:10.1016/j.onehlt.2019.100093), 2019-04-16
Supplement: mmc4.pdf [file mmc4.pdf]

## Participating Ministries, Agencies, and Organizations at One Health systems assessment meetings and workshops

### Disease Prioritization Meeting (13 November, 2015)

| Ministry/Institution                   | Department/Division<br>(if applicable)              | Number of<br>Representatives |
|----------------------------------------|-----------------------------------------------------|------------------------------|
| Carlin Communications (GWU consultant) | --                                                  | 1                            |
| George Washington University (GWU)     | Milken Institute School of Public Health            | 5                            |
| Ministry of Environment                | Department of Water and Forests                     | 1                            |
| Ministry of Environment                | Office of Parks and Reserves (OGUIPAR)              | 1                            |
| Ministry of Health                     | National Public Health Institute (INSP)             | 1                            |
| Ministry of Health                     | National Directorate for Communicable Diseases      | 1                            |
| Ministry of Livestock                  | Central Veterinary Diagnostic Laboratory (LCVD)     | 2                            |
| Ministry of Livestock                  | National Directorate for Veterinary Services (DNSV) | 2                            |

### Workshop 1 (24 November, 2015)

*Note: The One Health systems assessment information gathering took place as a working group discussion on Day 2 of a larger, three-day workshop hosted by the research team in collaboration with the National Public Health Institute of Guinea, related to strengthening national disease detection and laboratory capacity. One Health issues related to laboratory capacity, and particularly diagnosis of priority zoonotic diseases, were discussed throughout the three-day workshop. Entities/organizations that took part specifically in the One Health systems assessment information gathering working group discussion are highlighted in bold.*

| Organization/Institution            | Department/Division<br>(if applicable) | Number of<br>Representatives |
|-------------------------------------|----------------------------------------|------------------------------|
| Agence Française de Développement   | --                                     | 1                            |
| Agence de Médecine Préventive (AMP) | --                                     | 2                            |

|                                                                   |                                                                |          |
|-------------------------------------------------------------------|----------------------------------------------------------------|----------|
| Alliance for International Medical Action (ALIMA)                 | --                                                             | 1        |
| <b>Association of Public Health Laboratories (APHL)</b>           | --                                                             | <b>1</b> |
| Boke Regional Hospital                                            | --                                                             | 1        |
| Carlin Communications (GWU consultant)                            | --                                                             | 1        |
| Chinese-Guinean Friendship Hospital Kipe (HASIGUI)                | --                                                             | 1        |
| Eastern Mediterranean Public Health Network (EMPHNET)             | --                                                             | 2        |
| European CDC                                                      | --                                                             | 1        |
| European Mobile Laboratory (EM Lab)                               | --                                                             | 1        |
| European Union West African Mobile Laboratory (EUWAM Lab)         | --                                                             | 1        |
| <b>Expertise France</b>                                           | --                                                             | <b>2</b> |
| Faranah Regional Hospital                                         | --                                                             | 1        |
| FIND                                                              | --                                                             | 3        |
| <b>Fondation Mérieux</b>                                          | --                                                             | <b>3</b> |
| French National Institute of Health and Medical Research (INSERM) | PostEboGui project                                             | 1        |
| Gamal Abdul Nasser University of Conakry                          | Faculty of Medicine, Pharmacy and Dentistry                    | 2        |
| <b>Gamal Abdul Nasser University of Conakry</b>                   | <b>Center for Study and Research on the Environment (CERE)</b> | <b>1</b> |
| <b>George Washington University (GWU)</b>                         | <b>Milken Institute School of Public Health</b>                | <b>3</b> |
| Guinea Red Cross                                                  | --                                                             | 2        |
| Ignace Deen Hospital                                              | --                                                             | 1        |
| Institut Pasteur-Dakar                                            | --                                                             | 1        |
| <b>Institut Pasteur-Guinea<sup>1</sup></b>                        | --                                                             | <b>1</b> |

---

<sup>1</sup> In 2017, Institut Pasteur-Guinea was formally established under the authority of the Ministry of Higher Education and Scientific Research.

|                                                                         |                                                                            |          |
|-------------------------------------------------------------------------|----------------------------------------------------------------------------|----------|
| International Federation of Red Cross and Red Crescent Societies (IFRC) | --                                                                         | 1        |
| International Medical Corps (IMC)                                       | --                                                                         | 2        |
| Kankan Regional Hospital                                                | --                                                                         | 1        |
| Kindia Regional Hospital                                                | --                                                                         | 1        |
| K-PLAN Mobile Laboratory                                                | --                                                                         | 2        |
| <b>Ministry of Environment</b>                                          | <b>OGUIPAR</b>                                                             | <b>1</b> |
| <b>Ministry of Health</b>                                               | <b>INSP</b>                                                                | <b>9</b> |
| Ministry of Health                                                      | National Directorate for Pharmacy and Laboratories (DNPL)                  | 3        |
| Ministry of Higher Education and Scientific Research                    | Center for Research in Epidemiology, Microbiology and Medical Care (CREMS) | 3        |
| Ministry of Higher Education and Scientific Research                    | International Center for Research on Tropical Infectious (CIRIT)           | 1        |
| Ministry of Higher Education and Scientific Research                    | Institut Pasteur of Kindia (Pastoria) <sup>2</sup>                         | 1        |
| Ministry of Higher Education and Scientific Research                    | Viral Hemorrhagic Fever Laboratory                                         | 1        |
| <b>Ministry of Livestock</b>                                            | <b>LCVD</b>                                                                | <b>1</b> |
| Ministry of Security and Civil Protection                               | Department of Police                                                       | 1        |
| <b>National Ebola Coordination Cell (CNLEB)<sup>3</sup></b>             | --                                                                         | <b>3</b> |
| Pan-African Organization for the Fight for Health (OPALS)               | --                                                                         | 1        |
| Sandia National Laboratories                                            | --                                                                         | 2        |
| Santé Plus                                                              | --                                                                         | 1        |
| U.S. Centers for Disease Control and Prevention (CDC)                   | --                                                                         | 1        |

<sup>2</sup> The Kindia Pasteur Institute was replaced in 2017 by the new Institut Pasteur-Guinea, and the facility in Kindia re-established as the Institute for Research in Applied Biology

<sup>3</sup> The CNLEB was formally integrated into the Ministry of Health as the National Health Security Agency (ANSS) in July 2016.

|                           |                       |   |
|---------------------------|-----------------------|---|
| World Health Organization | Guinea country office | 1 |
|---------------------------|-----------------------|---|

### Workshop 2 (21 January, 2016)

*This one-day workshop was focused on information gathering related to the One Health systems assessment.*

| Organization/Institution                              | Department/Division<br>(if applicable)   | Number of<br>Representatives |
|-------------------------------------------------------|------------------------------------------|------------------------------|
| Carlin Communications (GWU consultant)                | --                                       | 1                            |
| George Washington University (GWU)                    | Milken Institute School of Public Health | 6                            |
| Ministry of Environment                               | OGUIPAR                                  | 1                            |
| Ministry of Environment                               | Department of Water and Forests          | 2                            |
| Ministry of Health                                    | Office of the Inspector General          | 1                            |
| Ministry of Health                                    | INSP                                     | 1                            |
| Ministry of Livestock                                 | DNSV                                     | 2                            |
| Ministry of Livestock                                 | LCVD                                     | 2                            |
| National Ebola Coordination Cell (CNLEB) <sup>4</sup> | --                                       | 1                            |
| U.S. CDC                                              | --                                       | 1                            |
| World Bank                                            | --                                       | 2                            |
| World Health Organization (WHO)                       | --                                       | 1                            |
| World Organisation for Animal Health (OIE)            | Regional office – West Africa            | 1                            |

### Workshop 3 (6 April, 2016)

*This one-day workshop convened stakeholders to review and validate the priority disease systems maps as well as develop prioritized recommendations to address the observed gaps.*

| Organization/Institution | Department/Division<br>(if applicable) | Number of<br>Representatives |
|--------------------------|----------------------------------------|------------------------------|
| DAI                      | Preparedness & Response project        | 2                            |

---

<sup>4</sup> *Ibid.*

|                                                                     |                                          |   |
|---------------------------------------------------------------------|------------------------------------------|---|
| Food and Agriculture Organisation of the United Nations (FAO)       | --                                       | 1 |
| George Washington University (GWU)                                  | Milken Institute School of Public Health | 5 |
| Higher Institute of Science and Veterinary Medicine, Dalaba (ISSMV) | --                                       | 2 |
| Ministry of Environment                                             | OGUIPAR                                  | 1 |
| Ministry of Environment                                             | Department of Water and Forests          | 1 |
| Ministry of Health                                                  | Office of the Inspector General          | 1 |
| Ministry of Health                                                  | INSP                                     | 2 |
| Ministry of Livestock                                               | DNSV                                     | 2 |
| Ministry of Livestock                                               | LCVD                                     | 3 |
| UNICEF                                                              | --                                       | 1 |
| United Nations Development Program (UNDP)                           | --                                       | 2 |
| US Agency for International Development (USAID)                     | --                                       | 1 |
| U.S. CDC                                                            | --                                       | 2 |
| World Bank                                                          | --                                       | 1 |
| World Health Organization (WHO)                                     | --                                       | 4 |
| World Organisation for Animal Health (OIE)                          | --                                       | 1 |
